# Supplementary material for: A rapid scan vacuum FTIR method for determining diffusion coefficients in viscous and glassy aerosol particles
Source: Royal Society of Chemistry journal article supplement (doi:10.1039/c7cp04473a), 2017-01-01
Supplement: c7cp04473a1.pdf [file c7cp04473a1.pdf]

1

Supporting Information of:

2 A rapid scan vacuum FTIR method for determining diffusion coefficients

3

in viscous and glassy aerosol particles

4

Yun Zhang<sup>1</sup>, Chen Cai<sup>1,3</sup>, Shu-Feng Pang<sup>1</sup>, Jonathan P. Reid<sup>2</sup>, Yun-Hong Zhang<sup>1\*</sup>

5

*<sup>1</sup>Institute for Chemical Physics, Beijing Institute of Technology,*

6

*Beijing 100081, People's Republic of China*

7

*<sup>2</sup>School of Chemistry, University of Bristol, Bristol BS8 1TS, United Kingdom*

8

*<sup>3</sup>Department of Atmospheric and Oceanic Sciences, School of Physics,*

9

*Peking University, Beijing 100871, People's Republic of China*

10 **Table S1.** Comparison between KWW function fitted parameters of RH steps with or without  
 11 limitation of  $\beta=1$ .

| <i>RH</i> / % | $\tau$ / s    | $\beta$ | $\tau$ / s  | $\beta$ |
|---------------|---------------|---------|-------------|---------|
| Experiment 1  | No limitation |         | $\beta = 1$ |         |
| <b>61-56</b>  | 12            | 0.97    | 13          | 1       |
| <b>56-50</b>  | 20            | 0.83    | 22          | 1       |
| <b>44-38</b>  | 198           | 0.56    | 178         | 1       |
| <b>39-32</b>  | 131           | 1       | 130         | 1       |
| <b>32-26</b>  | 341           | 0.76    | 380         | 1       |
| <b>26-20</b>  | 939           | 0.71    | 934         | 1       |
| <b>20-13</b>  | 2811          | 0.63    | 3166        | 1       |
| <b>13-0</b>   | 4790          | 0.72    | 5028        | 1       |
| <b>0-22</b>   | 743           | 0.65    | 700         | 1       |
| <b>22-45</b>  | 39            | 3.42    | 35          | 1       |
| <b>48-0</b>   | 868           | 0.58    | 936         | 1       |
| Experiment 2  | No limitation |         | $\beta = 1$ |         |
| <b>59-52</b>  | 7             | 1.1     | 7           | 1       |
| <b>38-30</b>  | 80            | 0.84    | 80          | 1       |
| <b>30-18</b>  | 472           | 0.51    | 498         | 1       |
| <b>18-0</b>   | 3448          | 0.79    | 3734        | 1       |
| Experiment 3  | No limitation |         | $\beta = 1$ |         |
| <b>58-72</b>  | 0.6           | 0.68    | 1           | 1       |
| <b>48-64</b>  | 0.55          | 0.84    | 1           | 1       |

13 **Figure S1.** Sucrose mass growth factor curves and correspond KWW fitting in experiment 1.

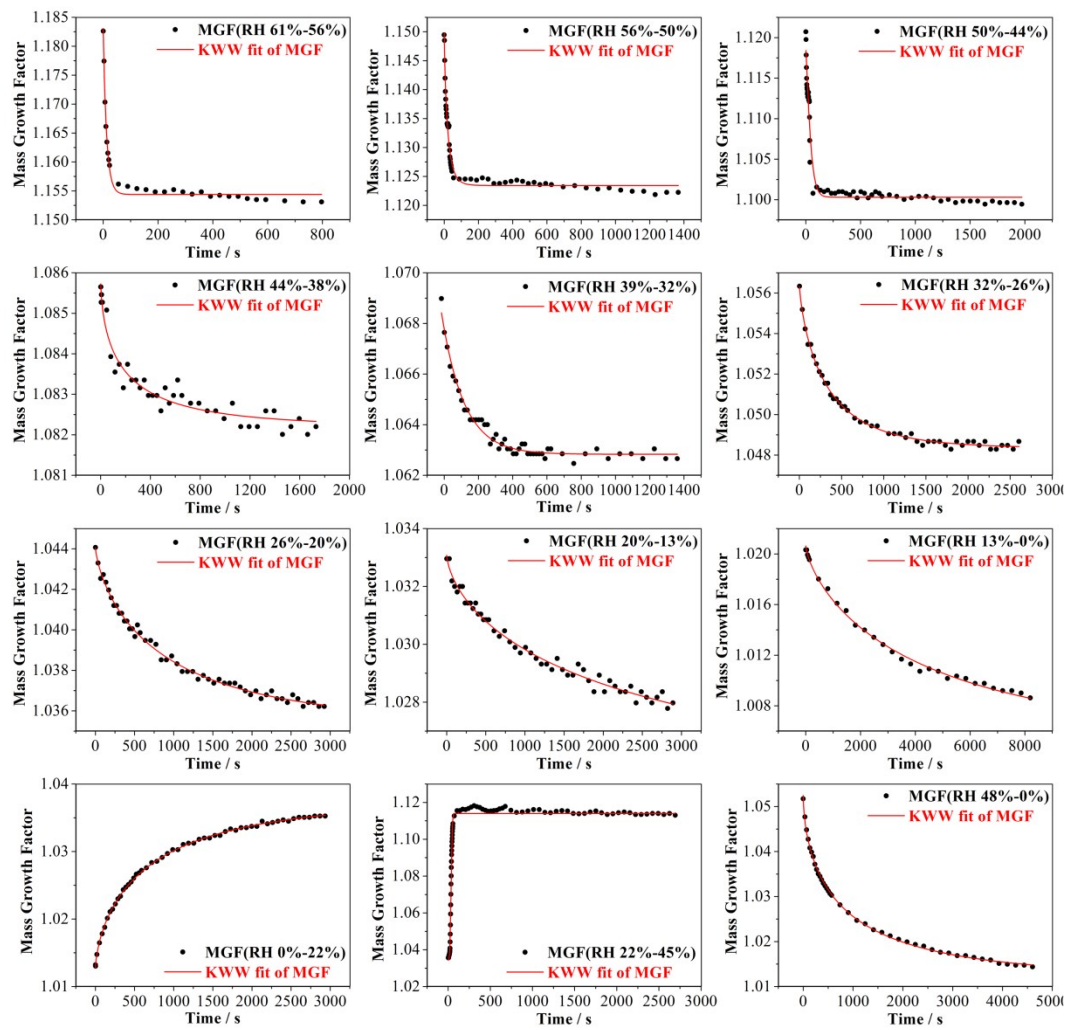

15 **Figure S2.** Sucrose mass growth factor curves and correspond KWW fitting in experiment 2 &  
16 experiment 3.

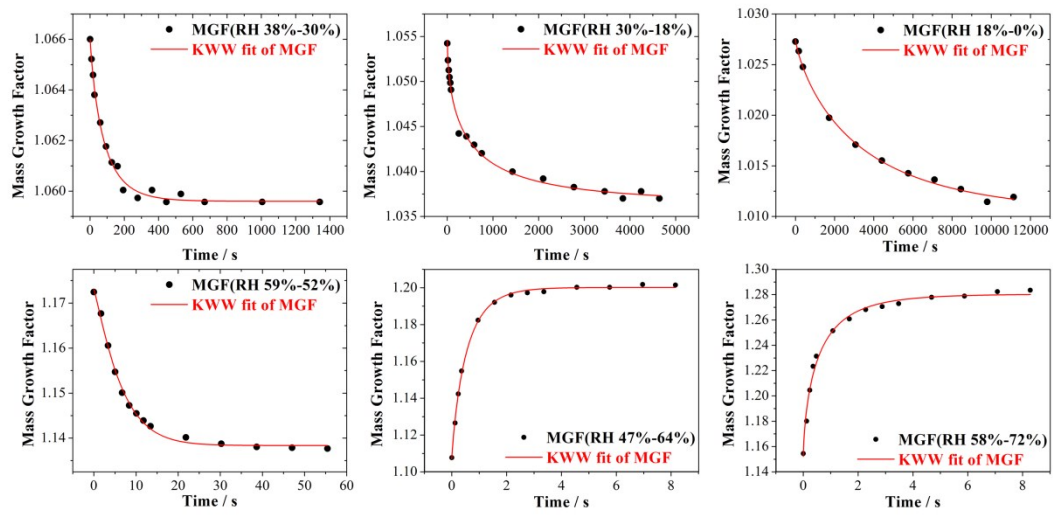

17
